# Supplementary material for: Structural development and dorsoventral maturation of the medial entorhinal cortex
Source: eLife. 2016 Apr 2;5:e13343. doi: 10.7554/eLife.13343 (PMC4876644; doi:10.7554/eLife.13343)
Supplement: Figure 1—source data 1. — DOI: http://dx.doi.org/10.7554/eLife.13343.005 [file elife-13343-fig1-data1.xlsx]

## Sheet: Fig 1b data
					Figure 1b Data
		Brain weight (in grams)
E18		0.1253	0.1182	0.1223
P0		0.3	0.2874	0.299	0.2963	0.3134	0.3174
P4		0.5371	0.595	0.4905	0.5235	0.6057
P8		0.8672	0.8515	0.8165	1.0982	1.0535
P12		1.1423	1.1625	1.3261	1.2565	1.2696
P16		1.3612	1.3948	1.4735	1.5913	1.6405
P20		1.3754	1.4818	1.6231	1.5798	1.5448
P24		1.698	1.6685	1.7347	1.6773	1.5974	1.8623
Adult		1.86	2.2065	2.0525	2.1205	2.4146	2.06	2.124	1.9833	2.1348

## Sheet: Fig 1d data
		Figure 1d Data
		Layer widths (in mu-m)
		L1	L2	L3	L4	L5/6
P0_1_1		58.7	29.8	147	13	148
P0_1_2		59.2	35	122	13	127
P0_1_3		58.4	29.6	136	15	125
P0_1_4		75.1	38	192	10	176
P0_1_5		92.5	47.5	177	14	149
P0_1_6		85.7	48.1	179	12	135
P0_2_1		58.1	40.1	107	17	138
P0_2_2		70.3	40.5	100	17	141
P0_2_3		80.3	32.7	102	16	164
P0_2_4		85.9	34.8	91.6	17	157
P0_2_5		72.5	36.3	93.7	18	150
P0_2_6		81	41.9	88.2	23	139
P0_3_1		93	34.8	107	19	206
P0_3_2		89.4	40.7	108	17	194
P0_3_3		85.1	38.2	103	19	162
P0_3_4		95.9	44.8	122	19	149
P0_3_5		94.6	36.9	123	19	131
P0_3_6		75.3	37.2	104	14	121
P0_4_1		114	34.3	134	26	157
P0_4_2		102	33.9	134	21	141
P0_4_3		89.4	35.5	136	21	133
P4_1_1		107	52	193	35	117
P4_1_2		105	65.9	204	37	156
P4_1_3		123	61.7	190	32	138
P4_1_4		88.2	56.9	194	38	215
P4_1_5		112	73.2	199	42	167
P4_1_6		117	77.2	185	28	156
P4_2_1		106	65.8	199	37	130
P4_2_2		106	64.4	193	35	101
P4_2_3		95.6	70.7	190	32	111
P4_2_4		90.9	75.4	173	35	155
P4_2_5		105	59.8	187	33	144
P4_2_6		124	54.5	182	29	132
P4_3_1		126	60.8	249	34	234
P4_3_2		135	64.2	228	23	189
P4_3_3		139	58.2	241	20	187
P4_3_4		81.3	65.1	214	43	220
P4_3_5		126	71.6	210	29	197
P4_3_6		110	59.1	215	29	196
P8_1_1		179	94.6	337	64	358
P8_1_2		166	100	326	40	335
P8_1_3		181	97.7	297	61	217
P8_1_4		142	98.8	340	48	290
P8_1_5		154	83.7	305	38	253
P8_1_6		149	83.8	291	38	196
P12_1_1		168	108	337	71	315
P12_1_2		170	121	351	69	257
P12_1_3		174	109	303	80	233
P12_1_4		147	124	333	62	287
P12_1_5		167	96.2	332	61	256
P12_1_6		160	91.8	338	63	130
P12_2_1		145	109	399	54	259
P12_2_2		168	113	405	59	244
P12_2_3		155	104	392	59	299
P12_2_4		186	139	386	52	269
P12_2_5		203	138	394	44	193
P12_2_6		208	154	346	61	230
P12_3_1		223	114	386	46	304
P12_3_2		191	135	406	54	283
P12_3_3		151	102	369	44	261
P12_3_4		170	147	393	53	305
P12_3_5		169	118	338	64	293
P12_3_6		169	100	350	73	251
P12_4_1		227	143	341	69	383
P12_4_2		225	145	329	57	357
P12_4_3		199	126	271	53	296
P12_4_4		202	103	322	70	323
P12_4_5		183	104	336	68	215
P12_4_6		181	92.4	326	66	196
P16_1_1		172	103	343	56	324
P16_1_2		188	117	325	43	252
P16_1_3		195	94.6	298	46	120
P16_1_4		220	154	193	43	265
P16_1_5		194	141	375	43	210
P16_1_6		203	108	361	38	164
P16_2_1		188	113	268	65	342
P16_2_2		217	121	294	70	285
P16_2_3		198	137	280	81	225
P16_2_4		202	103	319	53	361
P16_2_5		180	132	318	45	345
P16_2_6		172	148	309	45	262
P20_1_1		228	162	322	55	280
P20_1_2		211	154	363	56	206
P20_1_3		238	128	304	44	134
P20_1_4		191	131	344	63	320
P20_1_5		175	143	390	63	228
P20_1_6		205	135	353	67	167
P20_2_1		186	112	288	59	282
P20_2_2		222	121	280	55	178
P20_2_3		200	107	311	55	163
P20_2_4		207	113	247	50	311
P20_2_5		196	136	278	59	255
P20_2_6		208	102	302	55	171
P20_3_1		202	142	322	40	343
P20_3_2		199	128	346	49	278
P20_3_3		191	136	367	31	234
P20_3_4		208	108	322	56	338
P20_3_5		164	111	328	50	246
P20_3_6		173	115	341	66	203
P24_1_1		213	130	299	40	352
P24_1_2		208	139	312	42	297
P24_1_3		208	118	311	32	247
P24_1_4		225	114	277	70	316
P24_1_5		197	132	315	77	212
P24_1_6		154	108	347	65	218
P24_2_1		214	98.7	320	41	383
P24_2_2		174	151	341	34	288
P24_2_3		199	106	340	43	270
P24_2_4		196	95	273	55	337
P24_2_5		219	117	344	42	288
P24_2_6		204	113	319	44	274
P24_3_1		224	121	339	67	239
P24_3_2		180	131	375	64	176
P24_3_3		179	139	401	71	188
P24_3_4		177	123	290	77	283
P24_3_5		167	149	300	52	226
P24_3_6		210	127	314	79	188
Adult_1_1		133	111	216	67	250
Adult_1_2		145	117	236	44	219
Adult_1_3		169	111	297	38	205
Adult_1_4		119	136	273	49	306
Adult_1_5		161	114	264	43	234
Adult_1_6		165	115	255	39	215
Adult_2_1		171	111	303	51	303
Adult_2_2		166	139	310	45	305
Adult_2_3		147	129	326	54	240
Adult_2_4		221	138	297	40	347
Adult_2_5		200	136	307	51	223
Adult_2_6		194	139	274	42	161
Adult_3_1		136	122	347	69	374
Adult_3_2		149	127	338	83	288
Adult_3_3		150	120	334	91	203
Adult_3_4		165	90.4	273	42	290
Adult_3_5		154	118	267	41	289
Adult_3_6		137	101	301	39	256
Adult_4_1		215	102	307	77	283
Adult_4_2		173	101	288	41	233
Adult_4_3		206	118	267	51	228
Adult_4_4		219	107	258	53	275
Adult_4_5		157	102	263	42	270
Adult_4_6		203	93.2	294	45	195
