# Supplementary material for: Structural development and dorsoventral maturation of the medial entorhinal cortex
Source: eLife. 2016 Apr 2;5:e13343. doi: 10.7554/eLife.13343 (PMC4876644; doi:10.7554/eLife.13343)
Supplement: Figure 3—source data 1. — DOI: http://dx.doi.org/10.7554/eLife.13343.009 [file elife-13343-fig3-data1.xlsx]

## Sheet: Fig 3 data
			Figure 3 Data
		Total neurons	Total Area (in sq. mu-m)	Total density (per sq. mm)
P4P8_1		704	474409	1483.95
P4P8_2		512	530118	965.823
P4P8_3		339	310925	1090.3
P4P8_4		468	780232	599.822
P4P8_5		518	405859	1276.31
P4P8_6		521	544394	957.027
P4P8_7		432	535908	806.109
P4P8_8		282	608826	463.187
P12P16_1		447	1035718	431.585
P12P16_2		251	798469	314.352
P12P16_3		217	686408	316.139
P12P16_4		98	720448	136.026
P12P16_5		308	892586	345.065
P12P16_6		322	649035	496.121
P12P16_7		254	763839	332.531
P12P16_8		207	712998	290.323
Adult1		87	908041	95.8107
Adult2		107	904003	118.362
Adult3		93	743480	125.087
Adult4		63	638047	98.7388
Adult5		73	636434	114.702
Adult6		159	949571	167.444
Adult7		246	917452	268.134
