# Supplementary material for: Structural development and dorsoventral maturation of the medial entorhinal cortex
Source: eLife. 2016 Apr 2;5:e13343. doi: 10.7554/eLife.13343 (PMC4876644; doi:10.7554/eLife.13343)
Supplement: Figure 4—source data 1. — DOI: http://dx.doi.org/10.7554/eLife.13343.011 [file elife-13343-fig4-data1.xlsx]

## Sheet: Fig 4 data
			Figure 4 Data
		Total neurons	Total Area (in sq. mu-m)	Total density (per sq. mm)
P4P8_1		577	405859	1421.68
P4P8_2		416	544394	764.152
P4P8_3		237	535908	442.24
P4P8_4		175	608826	287.438
P12P16_1		912	649035	1405.16
P12P16_2		1288	763839	1686.22
P12P16_3		1109	712998	1555.4
Adult1		1167	636434	1833.65
Adult2		1771	949571	1865.05
Adult3		2101	917452	2290.04
