# Supplementary material for: Structural development and dorsoventral maturation of the medial entorhinal cortex
Source: eLife. 2016 Apr 2;5:e13343. doi: 10.7554/eLife.13343 (PMC4876644; doi:10.7554/eLife.13343)
Supplement: Figure 5—figure supplement 1—source data 1. — DOI: http://dx.doi.org/10.7554/eLife.13343.014 [file elife-13343-fig5-figsupp1-data1.xlsx]

## Sheet: Fig 5 data
							Figure 5 Data
			Dorsal				Intermediate				Ventral
		Neurons	Area (in sq. mu-m)	Density (per sq. mm)		Neurons	Area (in sq. mu-m)	Density (per sq. mm)		Neurons	Area (in sq. mu-m)	Density (per sq. mm)
P4P8_1		238	169881	1400.98		249	166724	1493.49		217	137804	1574.7
P4P8_2		177	195666	904.603		132	156288	844.595		203	178164	1139.4
P4P8_3		121	111825	1082.05		104	104322	996.913		114	94778	1202.81
P4P8_4		163	303399	537.246		139	231317	600.907		166	245516	676.127
P4P8_5		165	120936	1364.36		153	151648	1008.92		200	133275	1500.66
P4P8_6		93	181669	511.92		197	193346	1018.9		231	169379	1363.81
P4P8_7		94	172681	544.356		170	194189	875.436		168	169038	993.859
P4P8_8		90	223890	401.983		92	201644	456.25		100	183292	545.578
P12P16_1		42	304639	137.868		125	382784	326.555		280	348295	803.916
P12P16_2		54	223480	241.632		80	267122	299.489		117	307867	380.034
P12P16_3		48	237839	201.817		80	240264	332.967		89	208305	427.258
P12P16_4		13	232209	55.984		26	237302	109.565		59	250937	235.119
P12P16_5		93	324106	286.943		122	308827	395.043		93	259653	358.17
P12P16_6		87	214903	404.834		93	188518	493.322		142	245614	578.143
P12P16_7		63	260558	241.789		90	264774	339.913		101	238507	423.468
P12P16_8		62	266904	232.293		53	209433	253.064		92	236661	388.742
Adult1		24	342717	70.0286		25	287384	86.9916		38	277940	136.72
Adult2		21	290649	72.2521		32	287445	111.326		54	325909	165.69
Adult3		11	321689	34.1945		26	221696	117.278		56	200095	279.867
Adult4		8	253020	31.6181		13	199206	65.2591		42	185821	226.024
Adult5		14	227816	61.4531		23	237964	96.6533		36	170654	210.953
Adult6		28	345865	80.9564		54	327980	164.644		77	275726	279.263
Adult7		74	323096	229.034		60	342681	175.09		112	251675	445.018

## Sheet: Fig 5 supplementary fig 1 data
							Figure 5 supplementray fig 1 data
			Dorsal				Intermediate				Ventral
		Neurons	Area (in sq. mu-m)	Density (per sq. mm)		Neurons	Area (in sq. mu-m)	Density (per sq. mm)		Neurons	Area (in sq. mu-m)	Density (per sq. mm)
P4P8_1		202	120936	1670.3		238	151648	1569.42		137	133275	1027.95
P4P8_2		142	181669	781.641		152	193346	786.155		122	169379	720.278
P4P8_3		84	172681	486.446		75	194189	386.222		78	169038	461.435
P4P8_4		65	223890	290.321		62	201644	307.473		48	183292	261.877
P12P16_1		319	214903	1484.39		259	188518	1373.87		334	245614	1359.86
P12P16_2		506	260558	1941.99		396	264774	1495.62		386	238507	1618.4
P12P16_3		447	266904	1674.76		319	209433	1523.16		343	236661	1449.33
Adult1		502	227816	2203.53		419	237964	1760.77		246	170654	1441.51
Adult2		624	345865	1804.17		631	327980	1923.9		516	275726	1871.42
Adult3		719	323096	2225.34		808	342681	2357.88		574	251675	2280.72
