# Supplementary figures and images for: Structural development and dorsoventral maturation of the medial entorhinal cortex
Source: eLife journal article supplement (doi:10.7554/elife.13343), 2016-04-02

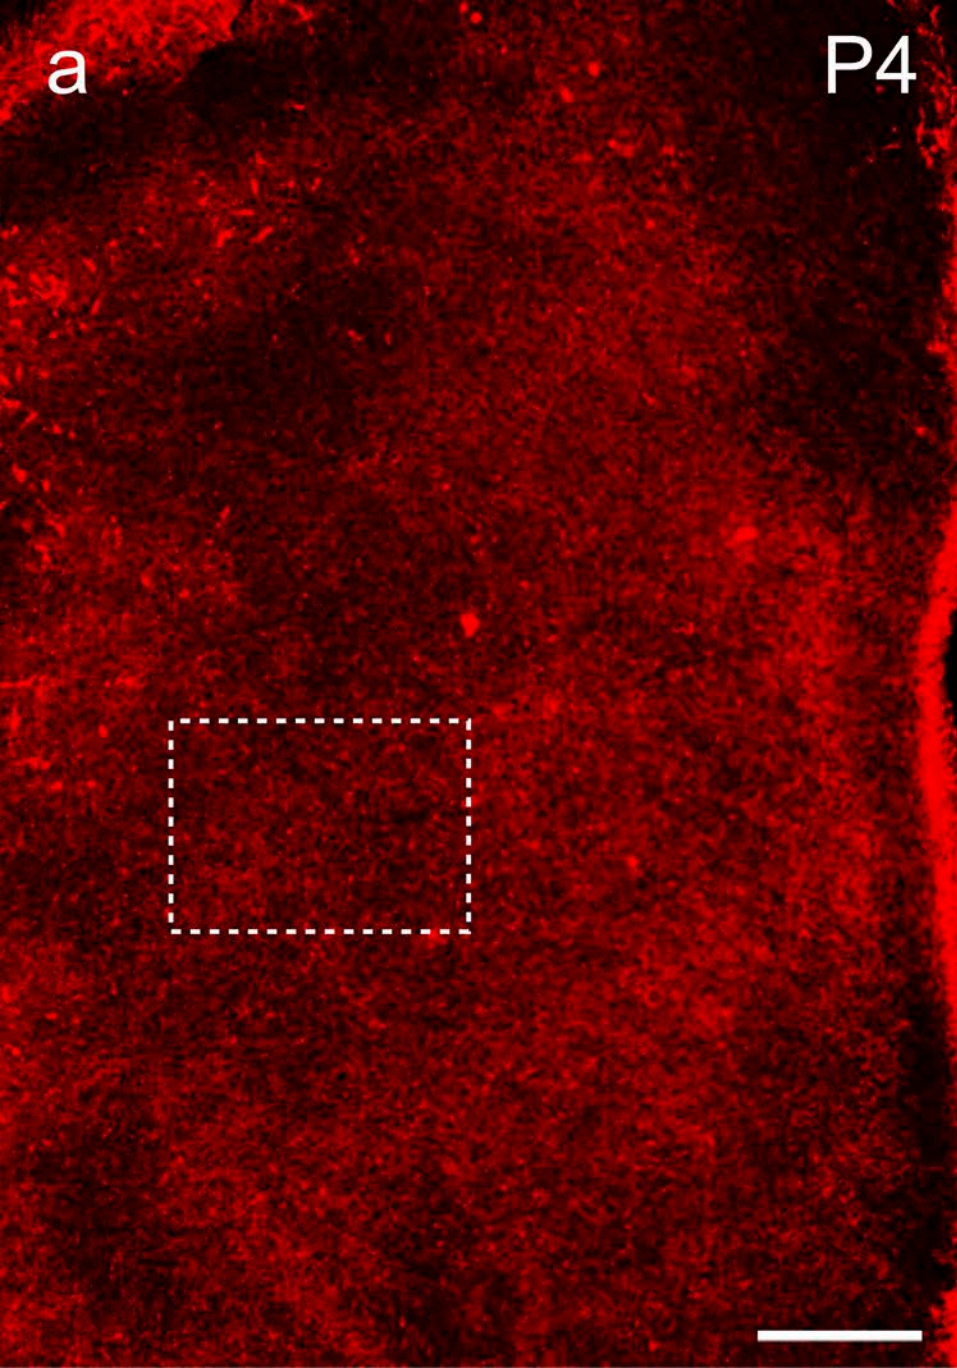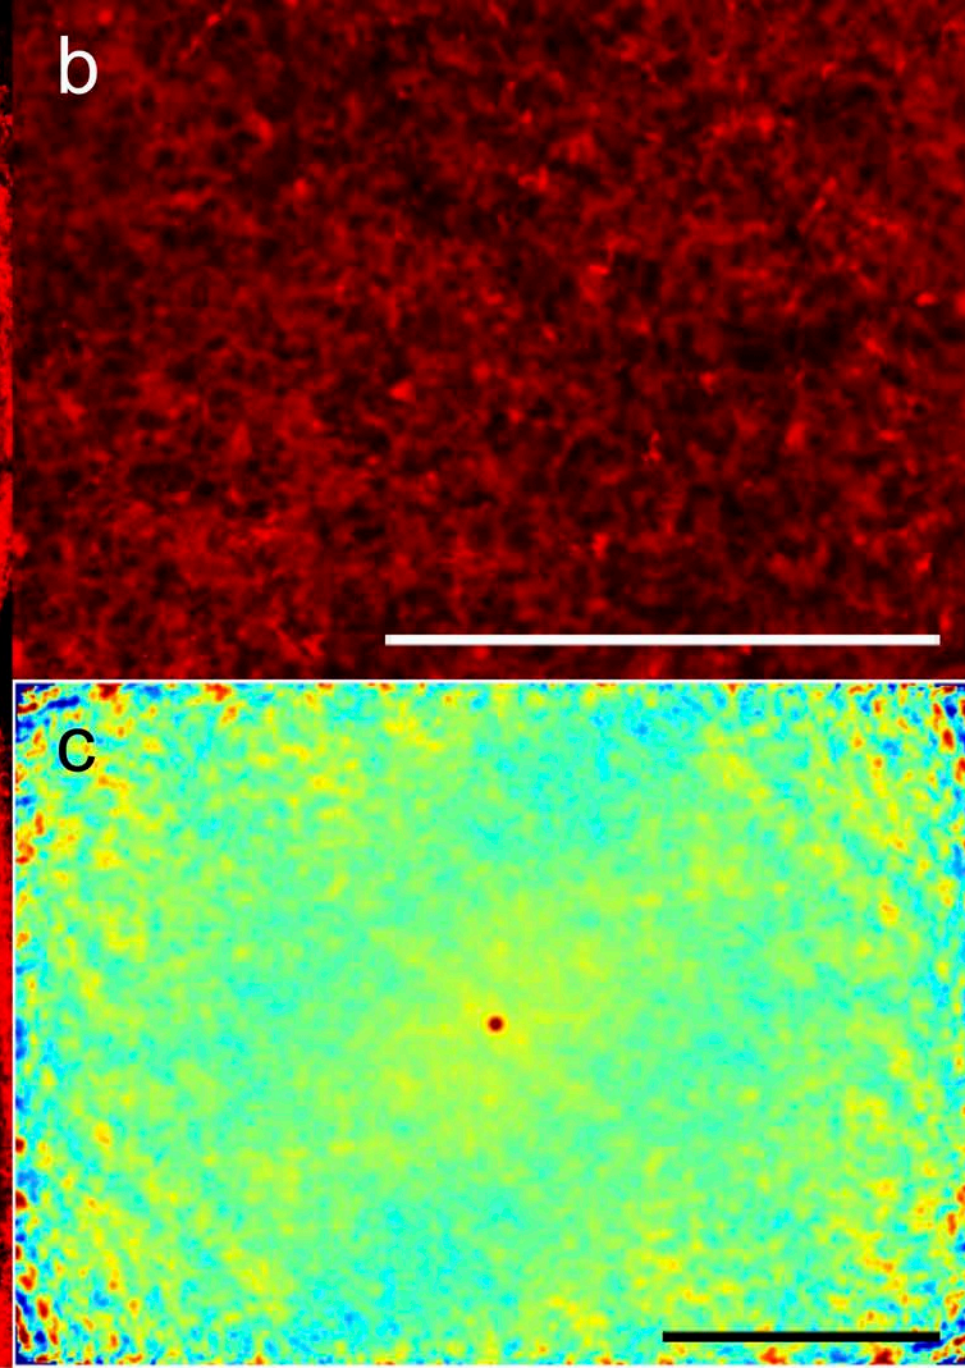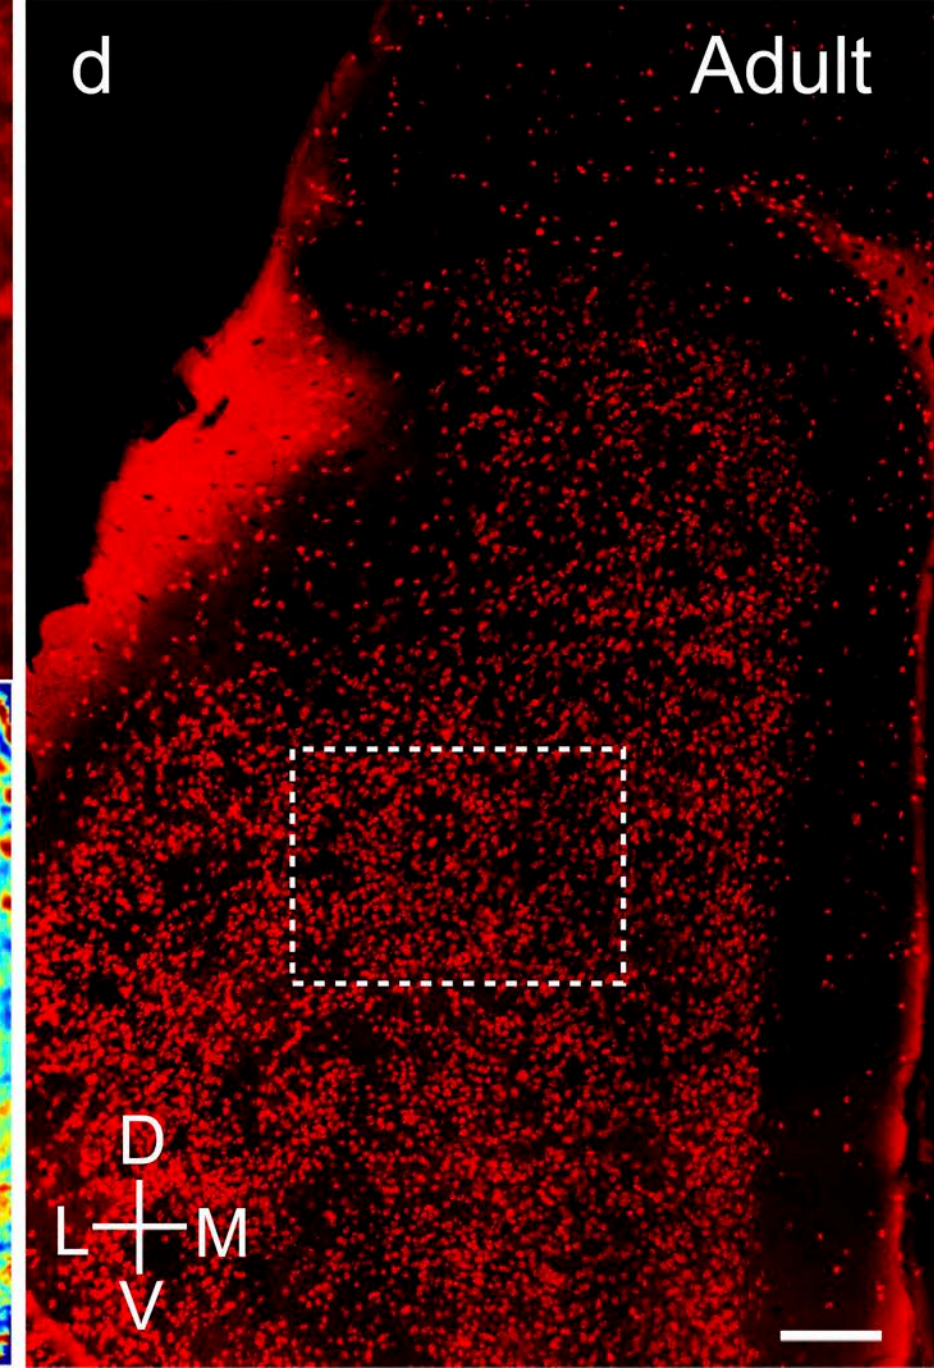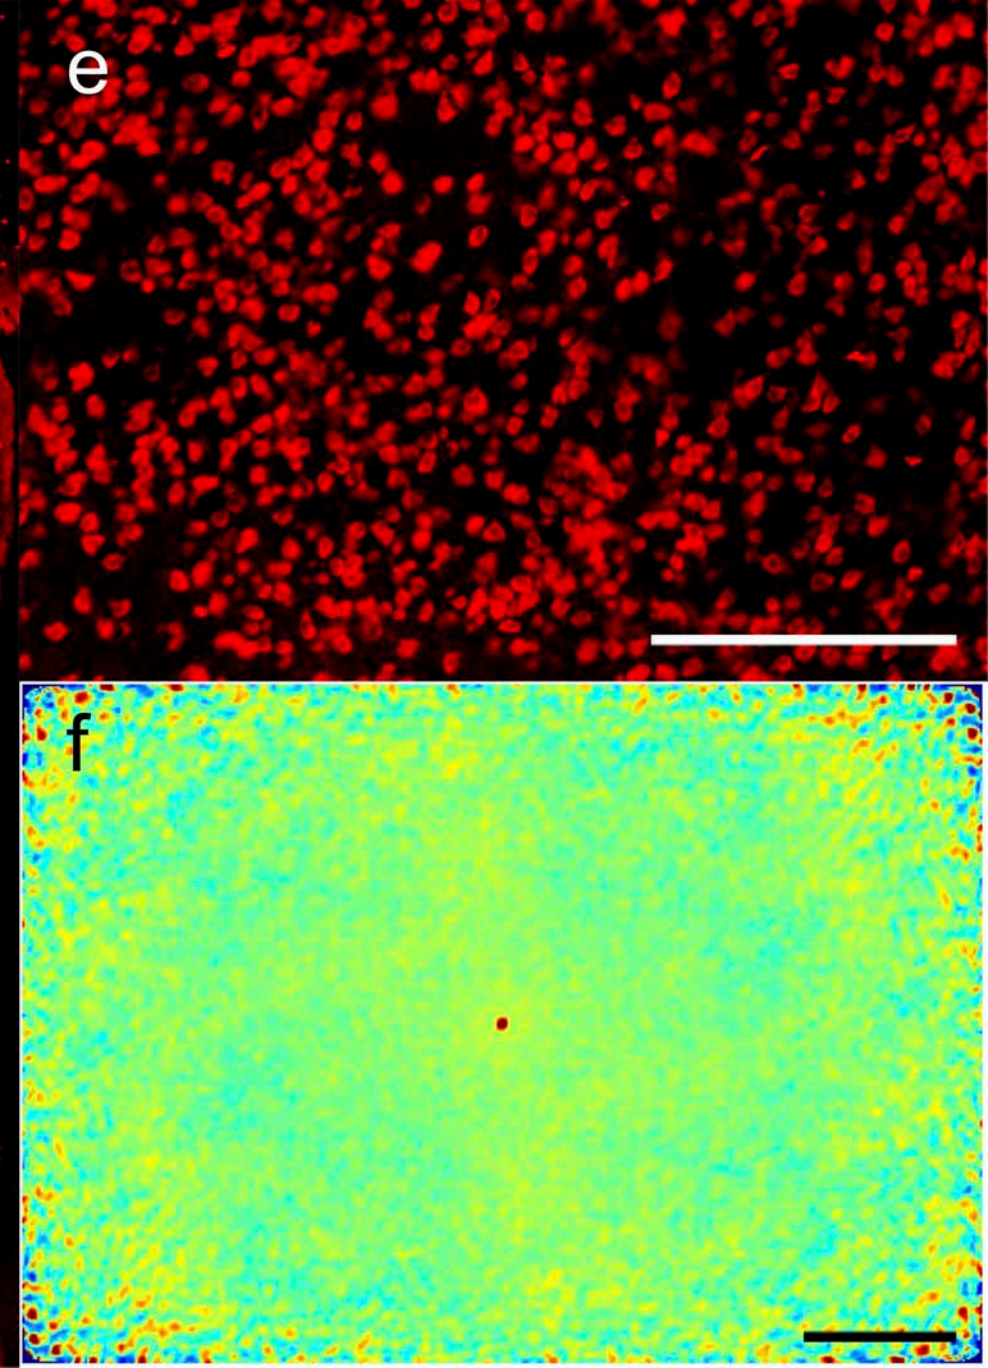

Supplement: supp [file elife_poa_e13343_Figure_2_figure_supplement_1.pdf › elife_poa_e13343_Figure_2_figure_supplement_1.pdf]

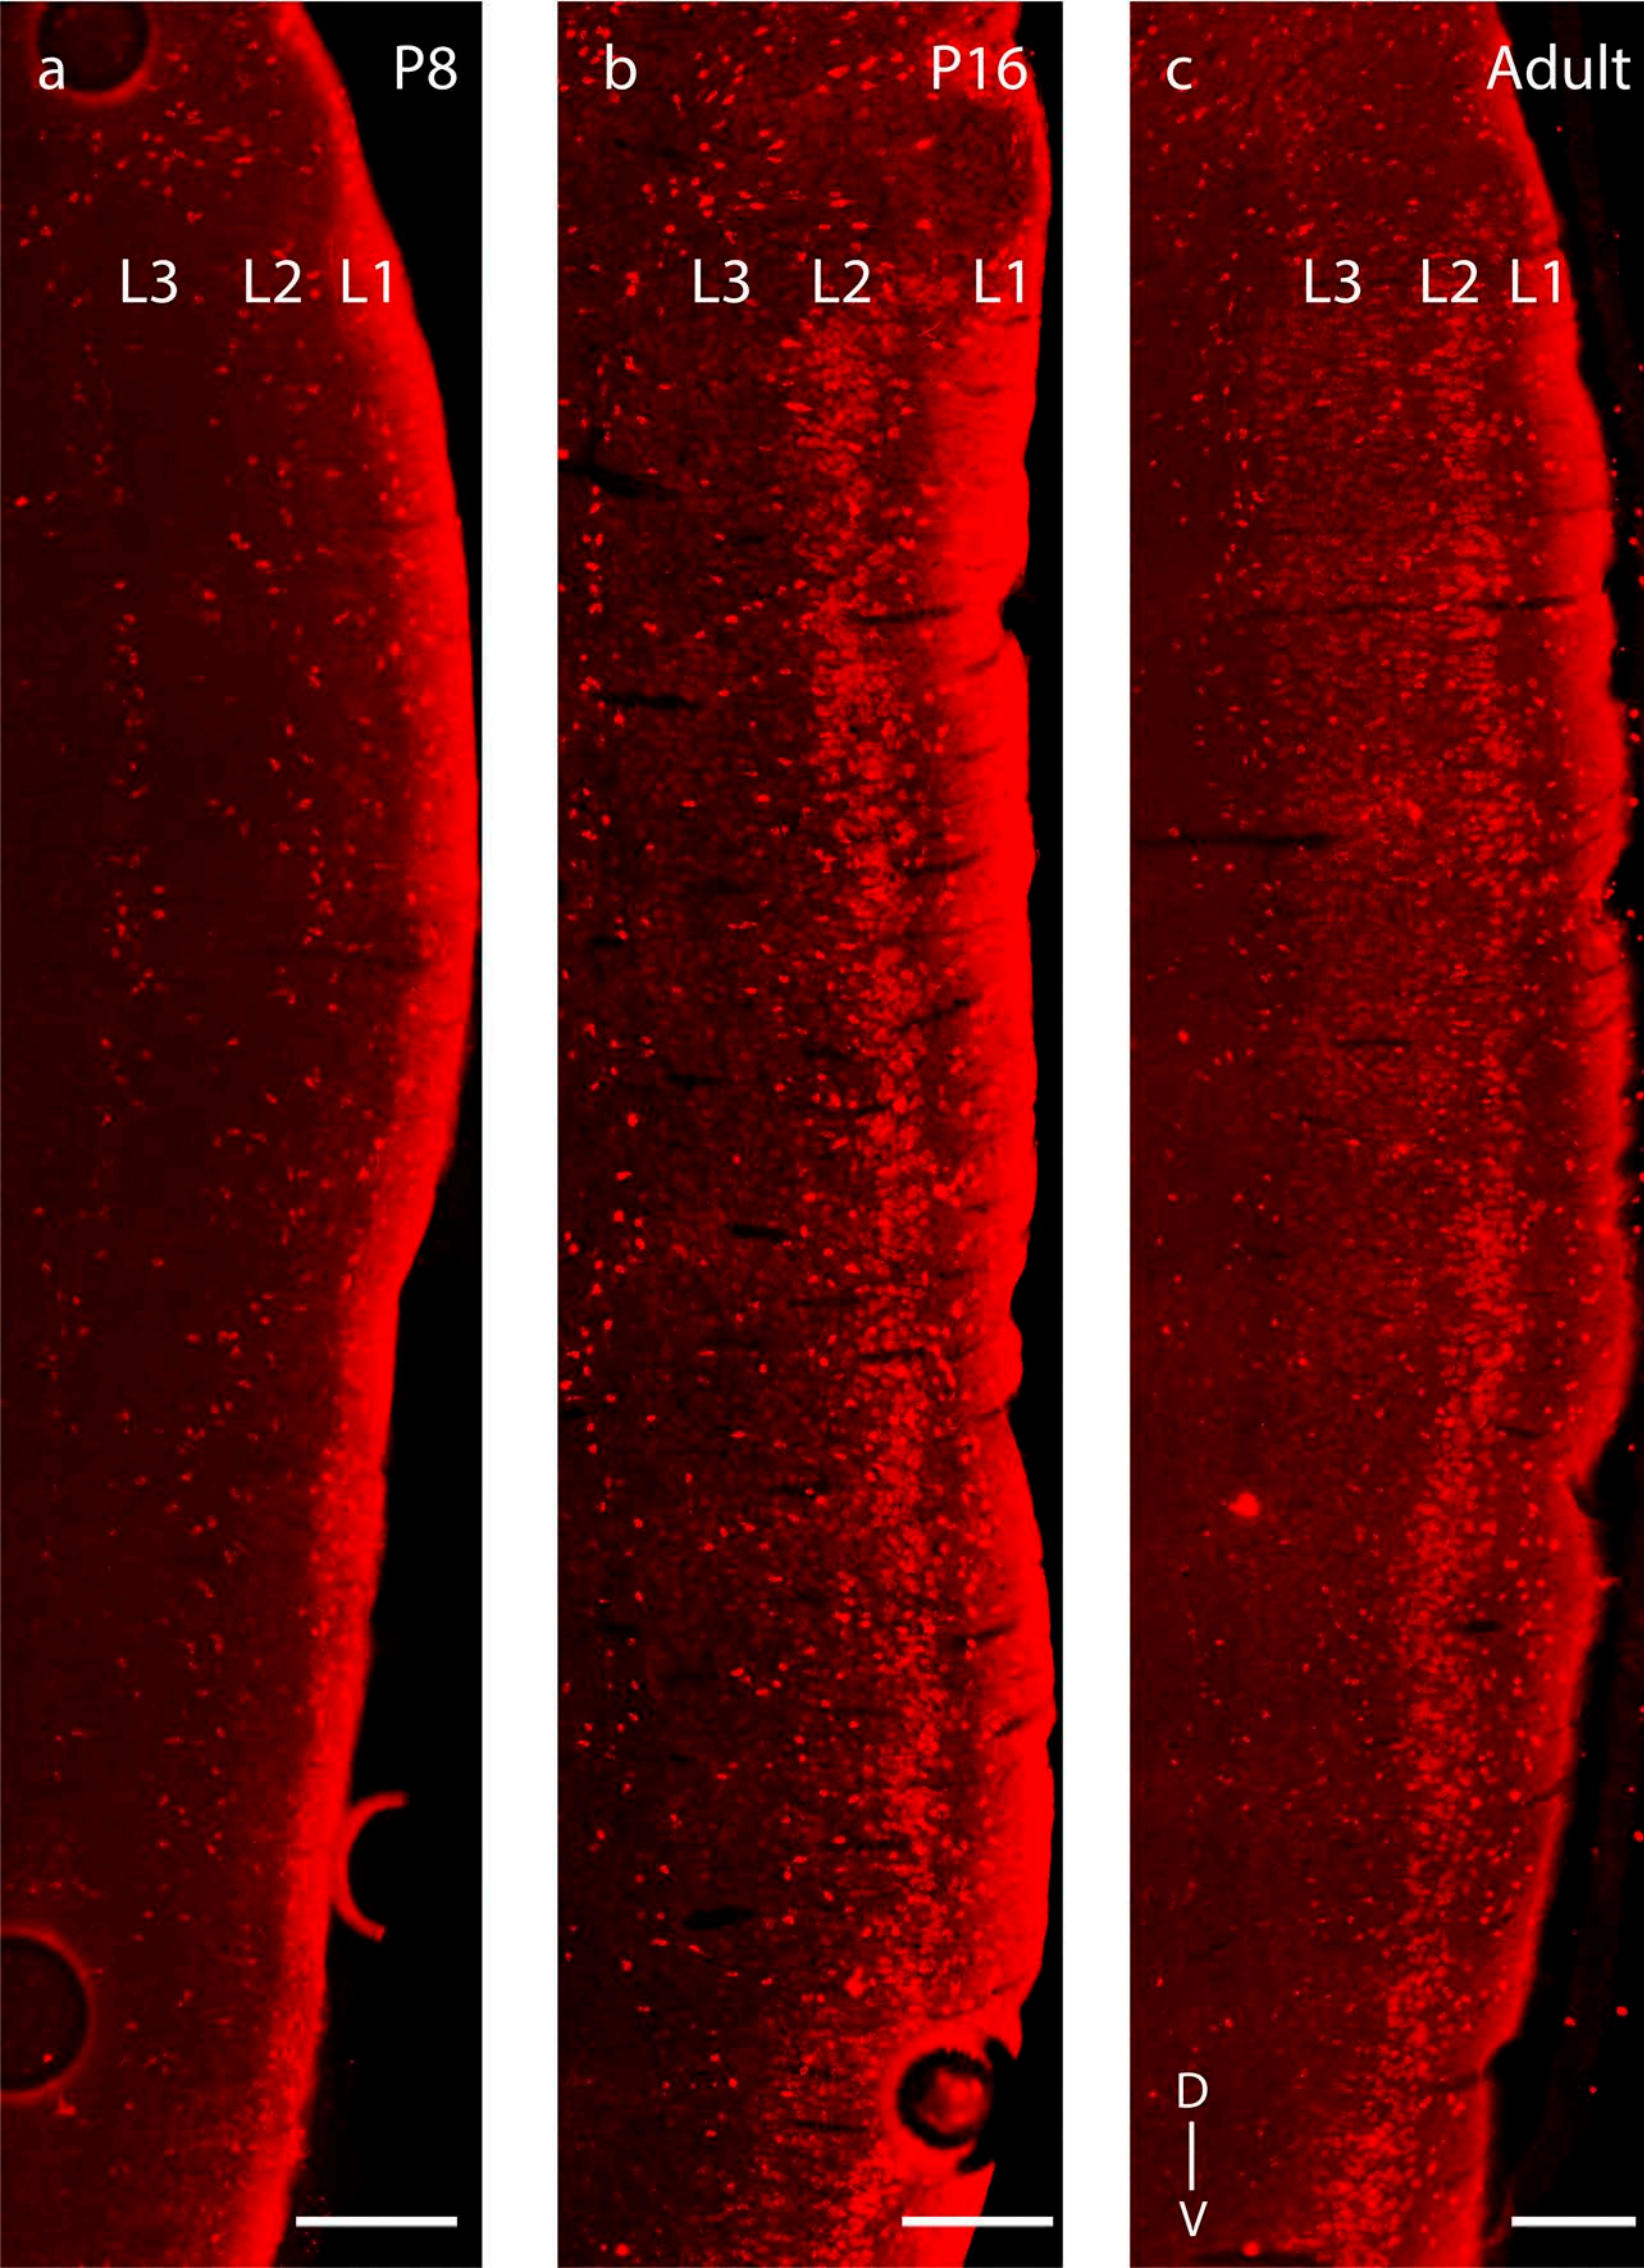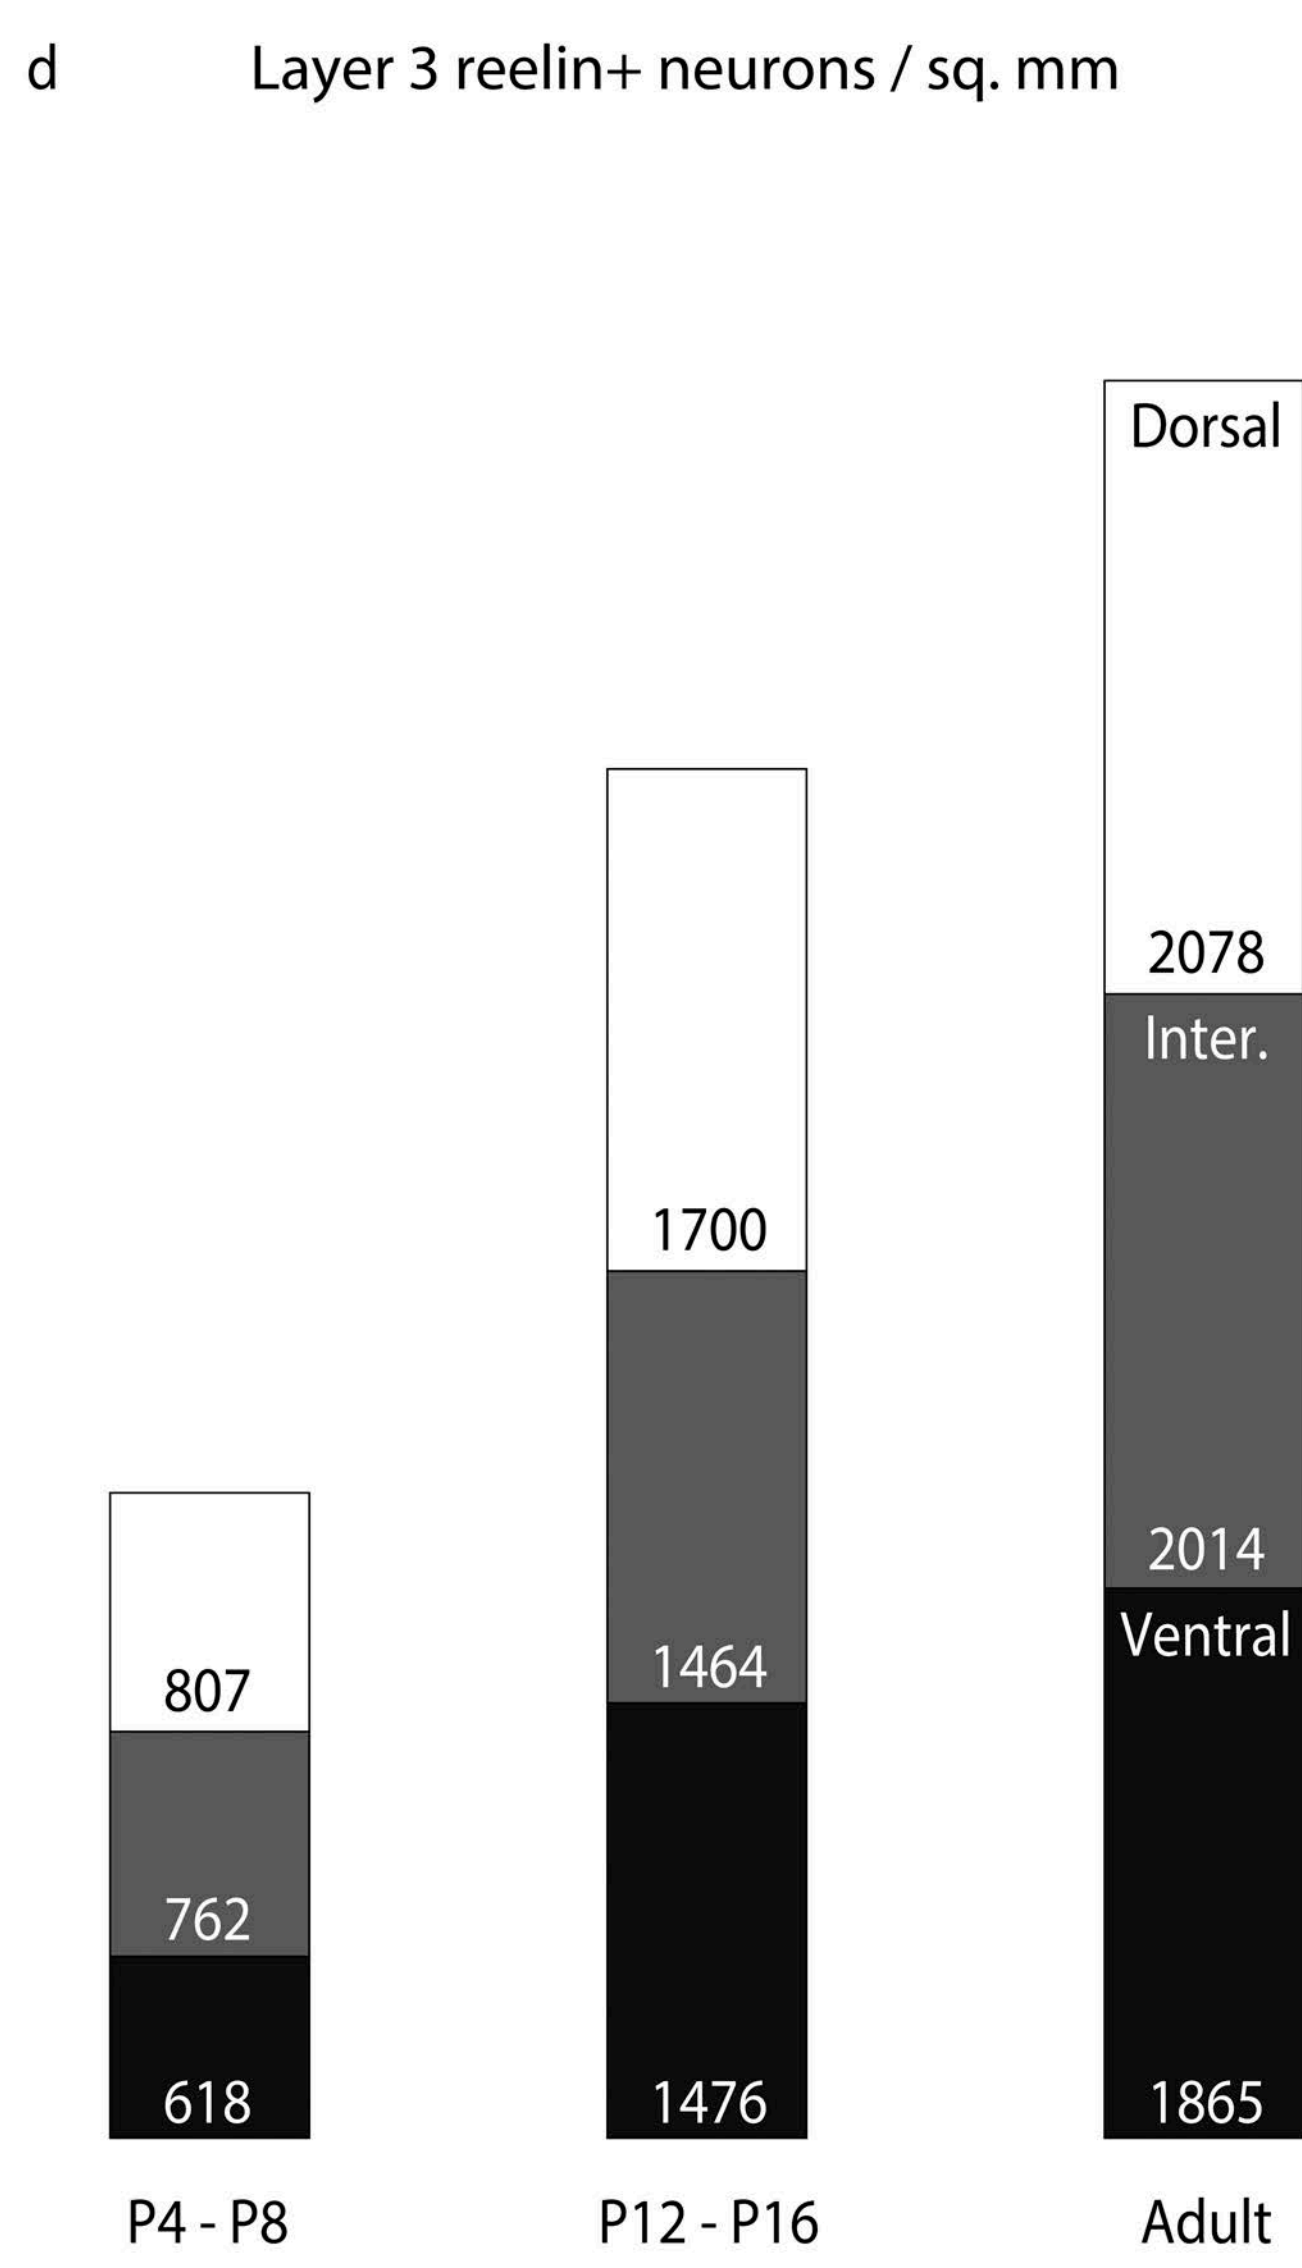

Supplement: supp [file elife_poa_e13343_Figure_5_figure_supplement_1.pdf › elife_poa_e13343_Figure_5_figure_supplement_1.pdf]
